# Supplementary material for: Network analysis of nitrate-sensitive oral microbiome reveals interactions with cognitive function and cardiovascular health across dietary interventions
Source: PubMed Central journal article supplement (PMC7970425; doi:10.1016/j.redox.2021.101933), 2021-03-05
Supplement: mmc1.pdf [file mmc1.pdf]

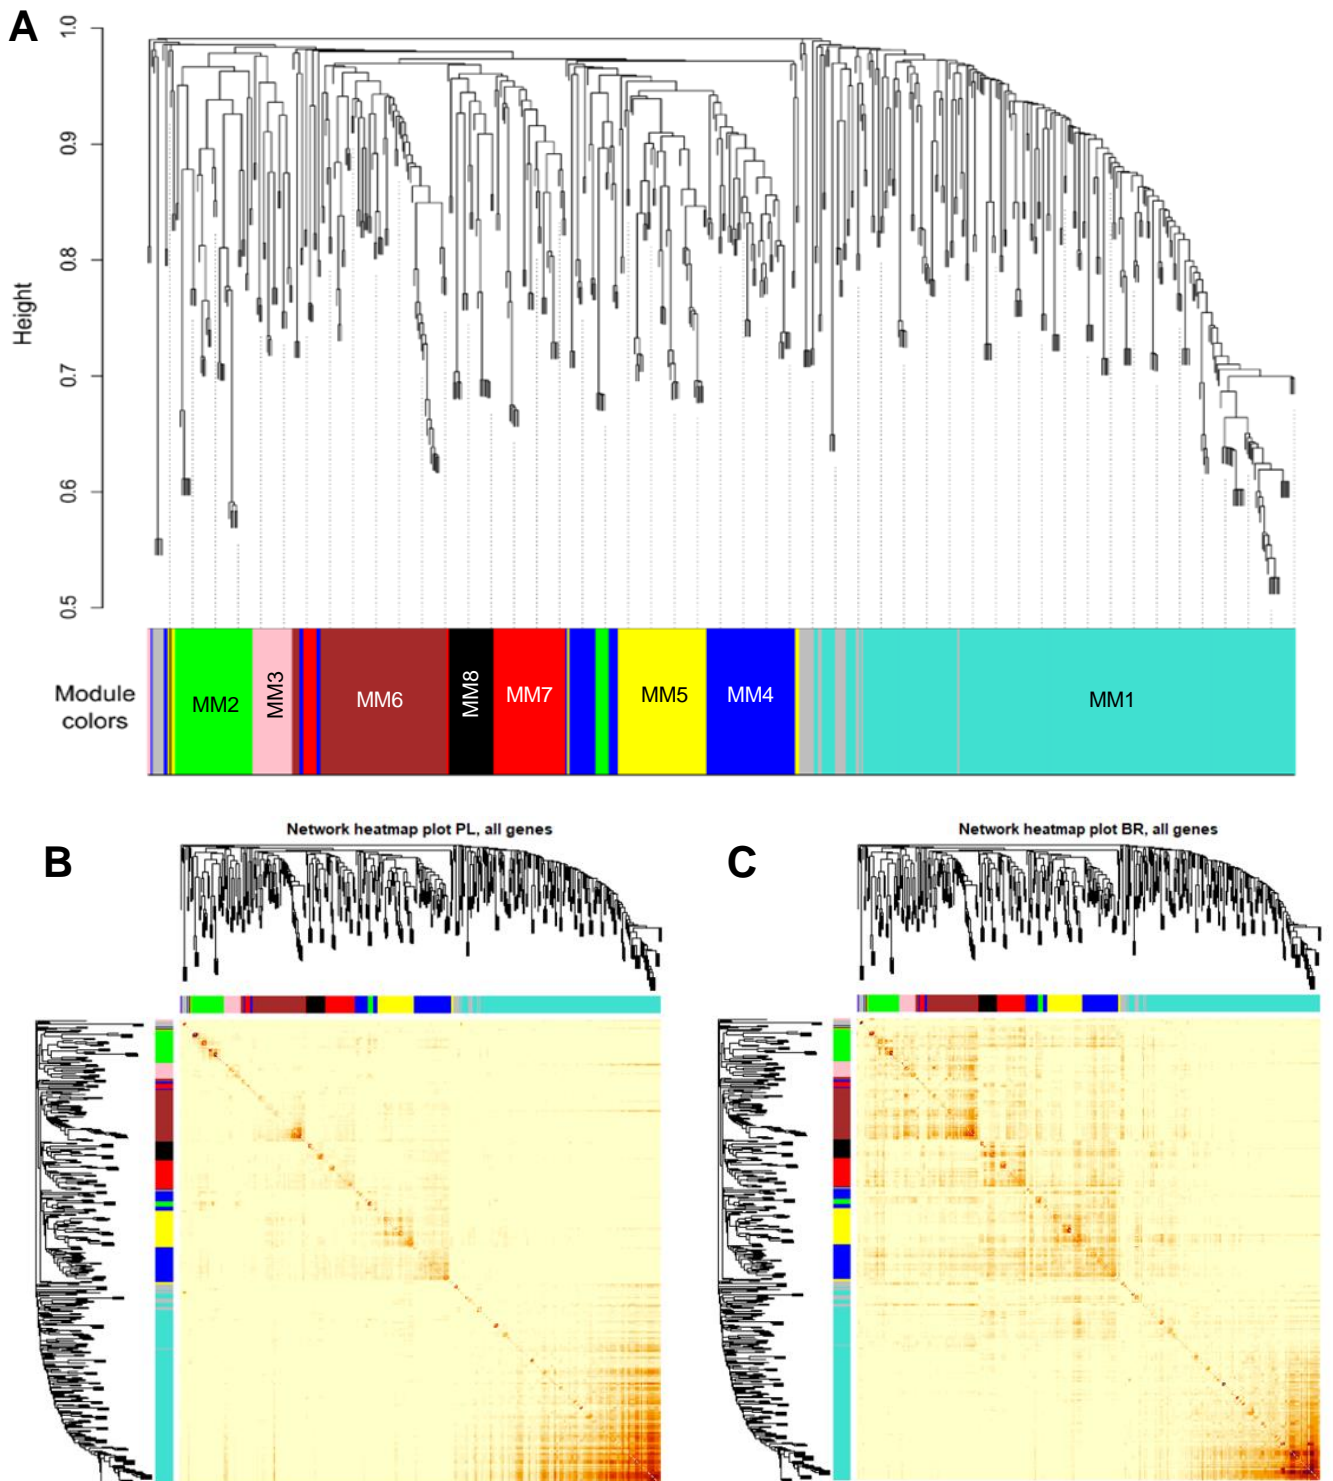

**Fig. S1. A:** Consensus gene dendrogram. Using a signed network where modules represent positively correlated taxonomic units (power  $>0.80$ ), a total of eight distinct microbiome modules (MM1-MM8) were identified. **B, C:** Heatmaps illustrating the microbiome networks in placebo (PL) and nitrate conditions (BR). A darker colour indicates a high overlap between the taxonomic units. The horizontal and vertical colour blocks represent the modules MM1-MM8.
