# Supplementary material for: Network analysis of nitrate-sensitive oral microbiome reveals interactions with cognitive function and cardiovascular health across dietary interventions
Source: PubMed Central journal article supplement (PMC7970425; doi:10.1016/j.redox.2021.101933), 2021-03-05

**A**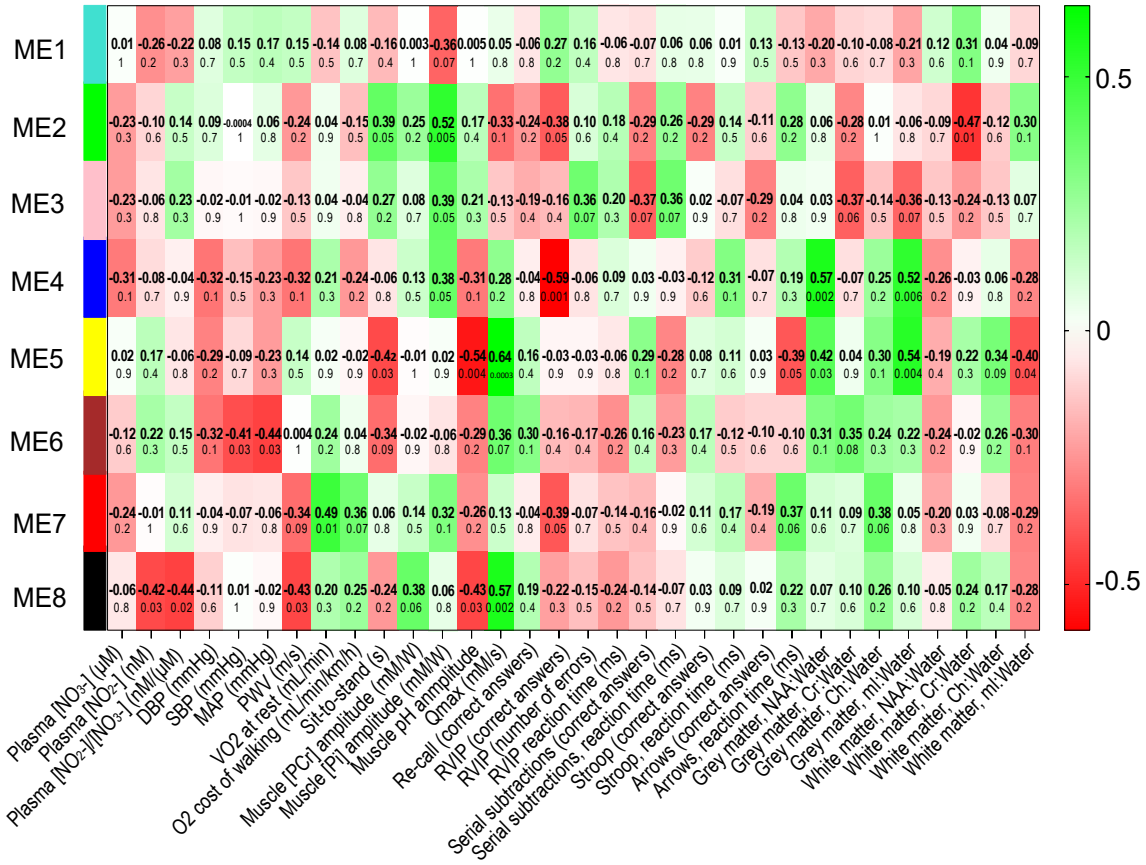**B**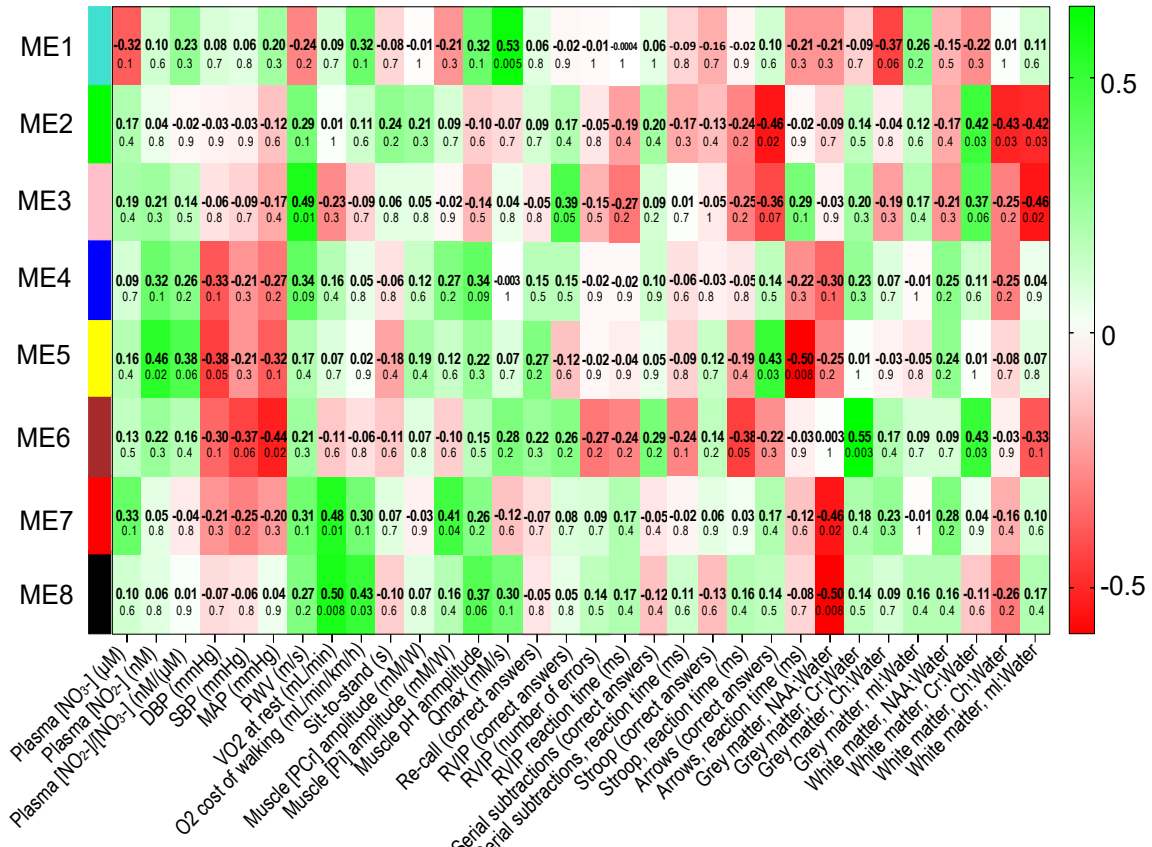

Supplement: mmc3.pdf [file mmc3.pdf]
